# Supplementary material for: CD16 promotes Escherichia coli sepsis through an FcRγ inhibitory pathway that prevents phagocytosis and facilitates inflammation
Source: Springer Nature journal article supplement (doi:10.1038/nm1665), 2007-10-14
Supplement: 41591_2007_BFnm1665_MOESM12_ESM.pdf [file 41591_2007_BFnm1665_MOESM12_ESM.pdf]

**CD16 promotes *E. coli* sepsis through an FcR $\gamma$  inhibitory pathway that prevents phagocytosis and facilitates inflammation.** Fabiano Pinheiro da Silva, Meryem Aloulou, David Skurnik, Marc Benhamou, Antoine Andremont, Irineu T. Velasco, Murilo Chiamolera, J. Sjeff Verbeek, Pierre Launay, and Renato C. Monteiro.

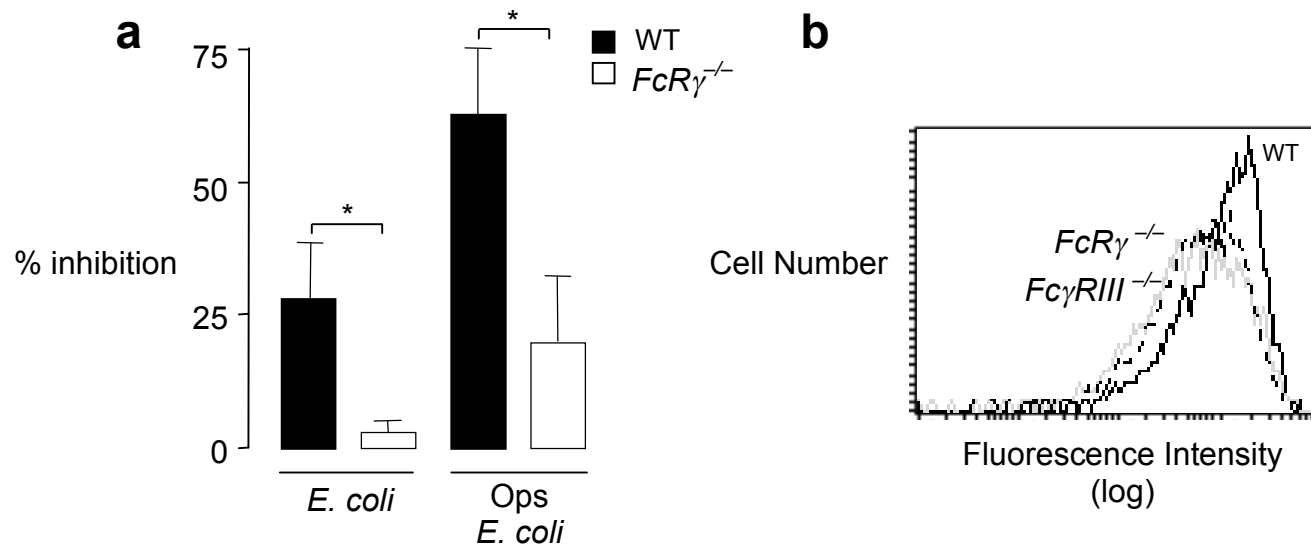

**Supplementary Figure 1.** 2.4G2 mAb inhibits binding of *E. coli* to macrophages. **(a)** 2.4G2 anti-Fc $\gamma$ RII/III mAb inhibits binding of unopsonized *E. coli* to bone marrow-derived macrophages. Six-day-cultured CSF-derived BMM were preincubated with 100  $\mu$ g/ml 2.4G2 or an irrelevant rat mAb (116), then washed and incubated with bacteria at 4°C for 30 min before washing and FACS analysis. Results are expressed as the percentage inhibition of *E. coli* binding by mAb 2.4G2. Mean fluorescence intensities of WT vs *FcR $\gamma$ <sup>-/-</sup>* cells pre-incubated with irrelevant mAb 116 were: 48  $\pm$  3.5 vs 50  $\pm$  3 for non opsonized bacteria and 61  $\pm$  8.4 vs 66  $\pm$  12 for opsonized bacteria, respectively. \**P* < 0.05. Control inhibition by 2.4G2 was even stronger (>65%) with opsonized *E. coli*, confirming the critical involvement of Fc $\gamma$ R in the binding of antibody-coated bacteria. **(b)** Decreased *E. coli* binding to peritoneal macrophages from *FcR $\gamma$*  or CD16-deficient mice as compared to WT mice. Cells were incubated with FITC-coupled *E. coli* for 30 min on ice and then analyzed by flow cytometry.

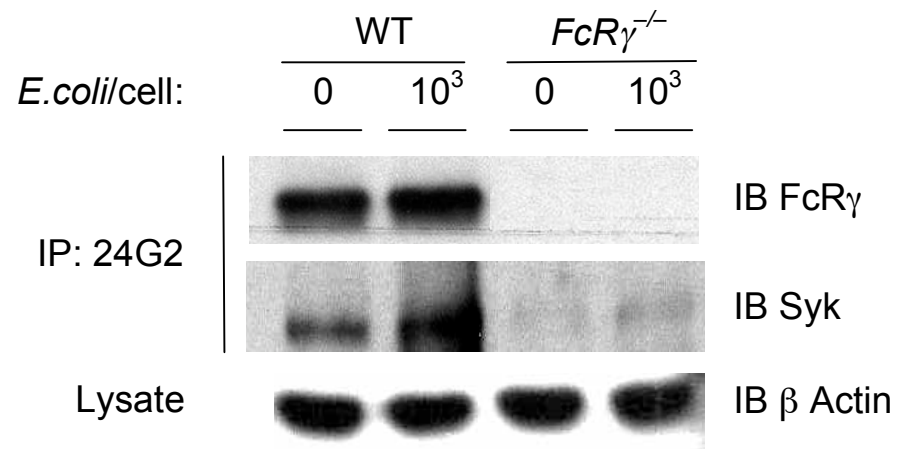

**Supplementary Figure 2.** *E. coli* induces recruitment of Syk. BMM from WT mice were stimulated with non-opsonized *E. coli* for 5 min at 37°C as indicated, then washed and solubilized in 1% digitonin. Lysates were immunoprecipitated with 2.4G2 or control rat IgG plus protein G Sepharose 4 Fast Flow beads. Immunoprecipitates were resolved by SDS-PAGE, transferred to a PVDF membrane and developed with anti-Syk plus a secondary goat anti-rabbit Ig Ab coupled to HRP.

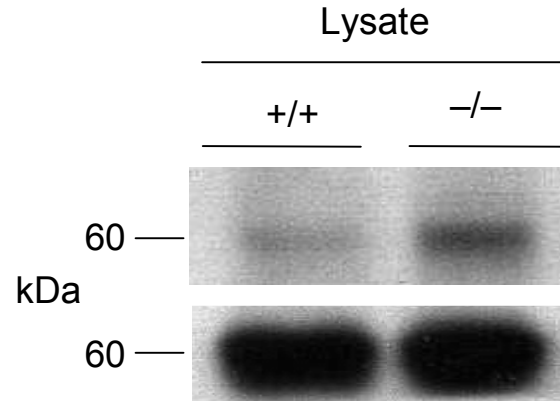

**Supplementary Figure 3.** Increased phosphorylation of Akt in  $FcR\gamma^{-/-}$  macrophages. BMM from the indicated mouse lines were lysed as in Fig 3g, immunoprecipitated with anti-Akt Ab and analyzed in anti-PY immunoblots. Anti-Akt immunoblots were used to control for equal sample loading. Analyses were done by SDS-12% PAGE in non reducing conditions.

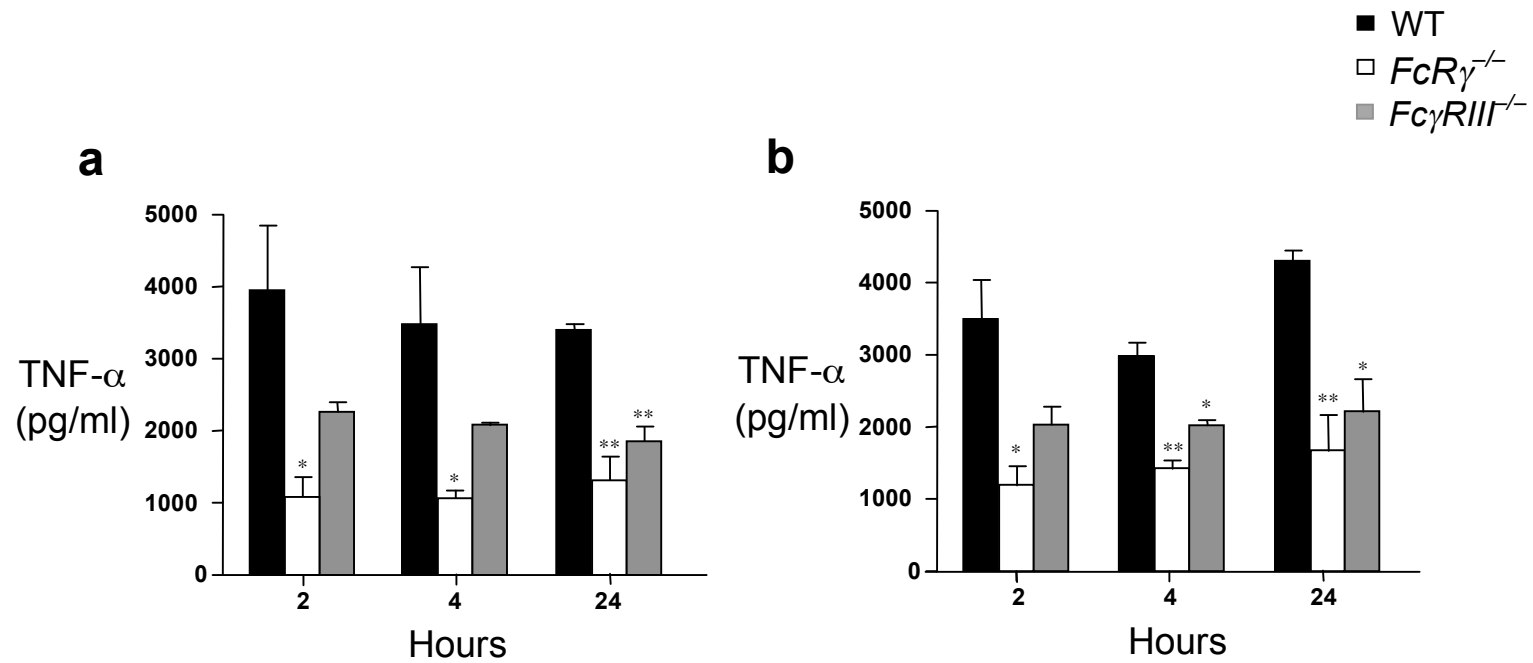

**Supplementary Figure 4.**  $FcR\gamma$  enhances TNF- $\alpha$  secretion following LPS stimulation. TNF- $\alpha$  release by BMM from  $FcR\gamma^{-/-}$  and  $Fc\gamma RIII^{-/-}$  and WT mice exposed to 20 (a) and 100 ng/ml (b) of LPS (*E. coli* derived) and for different times *in vitro*. TNF- $\alpha$  was measured by ELISA. The data are the means ( $\pm$ SD) of three independent experiments (\* $P < 0.05$  and \*\* $P < 0.01$ , Student's unpaired *t* test as compared to WT cells).

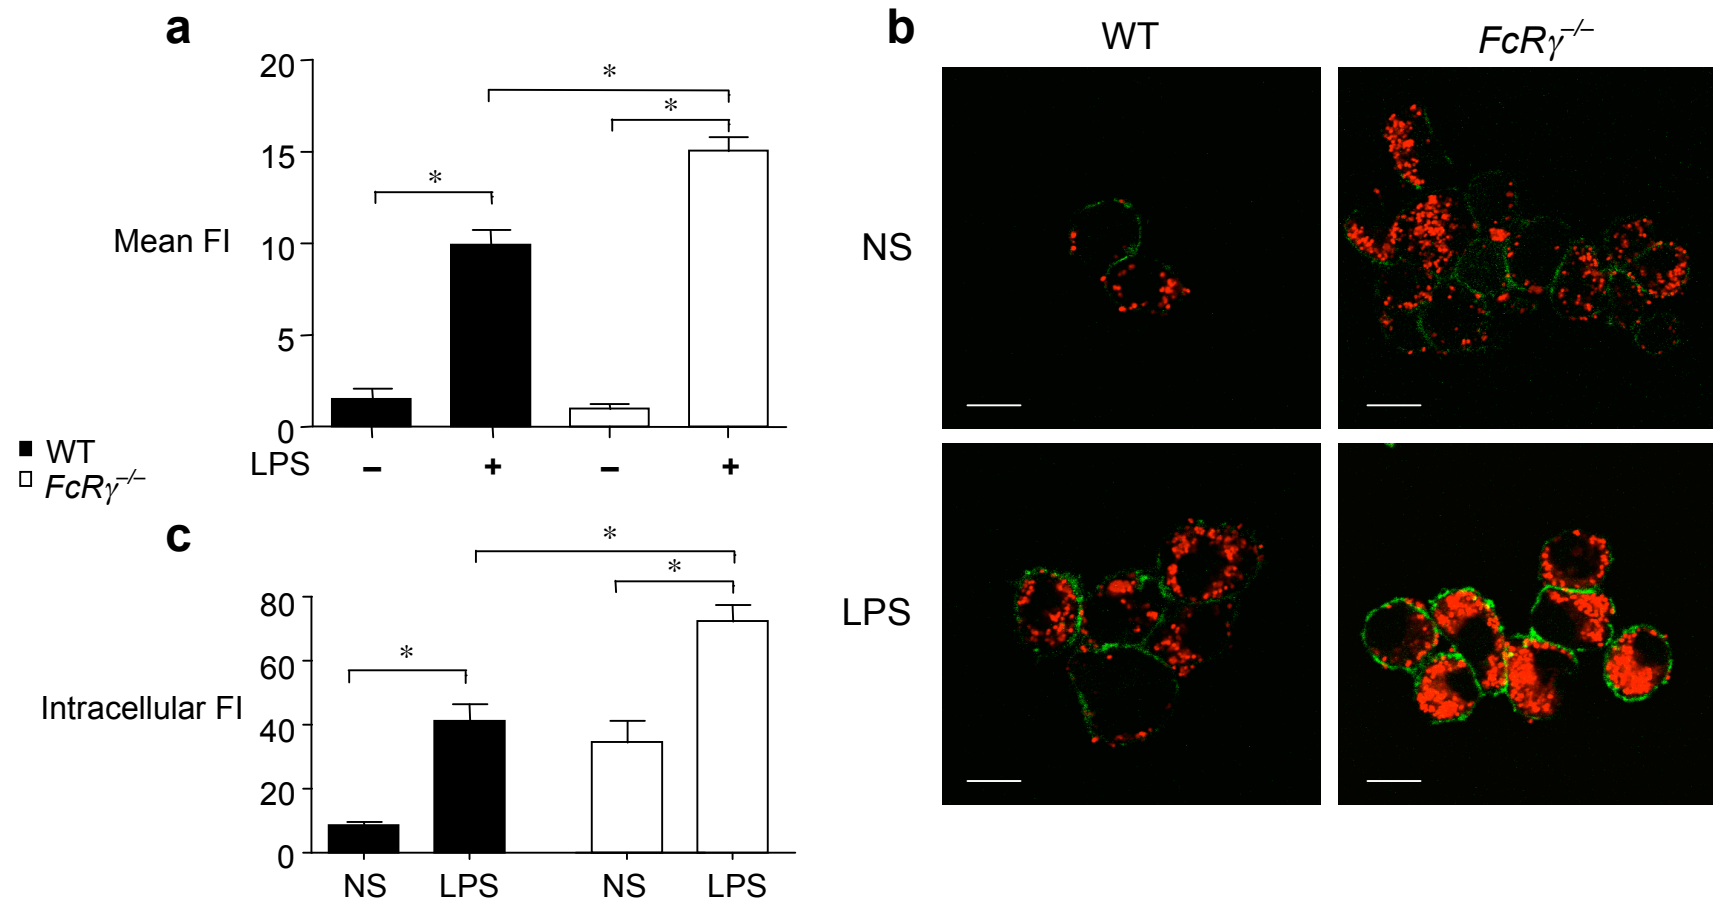

**Supplementary Figure 5.** Altered expression and function of MARCO in *FcR $\gamma$ <sup>-/-</sup>* cells following LPS stimulation. **(a)** MARCO expression was slightly upregulated on *FcR $\gamma$ <sup>-/-</sup>* cells after LPS stimulation. The data are the means ( $\pm$ SD) of three independent experiments ( $*P < 0.05$ , Student's unpaired *t* test). FI: Fluorescence Intensity. **(b)** Marked upregulation of MARCO-mediated *E. coli* phagocytosis by LPS stimulation of BMM from *FcR $\gamma$ <sup>-/-</sup>* mice. BMM were stimulated for 18 h with 100 ng/ml LPS, and phagocytosis of Texas red-labelled *E. coli* was measured as in figure 2a and b. **(c)** Quantification of phagocytosis was performed as in 2b, based on the red fluorescence intensity inside each cell. The data are the means ( $\pm$ SD) of three independent experiments ( $*P < 0.05$ , Student's unpaired *t* test). Scale Bars, 10  $\mu$ m.

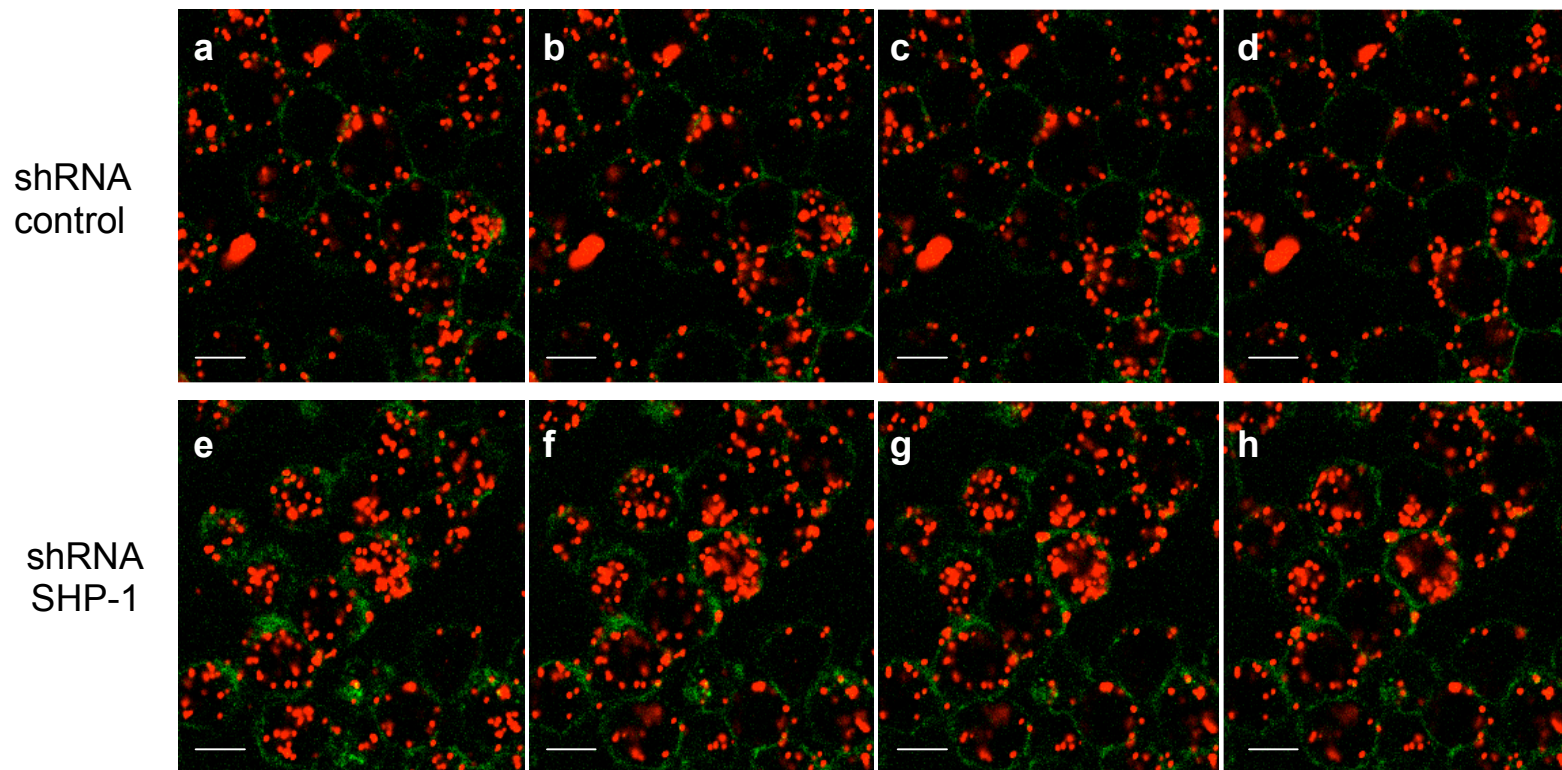

**Supplementary Figure 6.** Confocal microscopic analysis of *E. coli* phagocytosis in shRNA-treated J774 cells. Four median sections of optically sectioned cells at 0.4- $\mu\text{m}$  intervals are shown. (a–d) shRNA control (scrambled sequence), (e–f) shRNA for SHP-1. Scale Bars, 10  $\mu\text{m}$

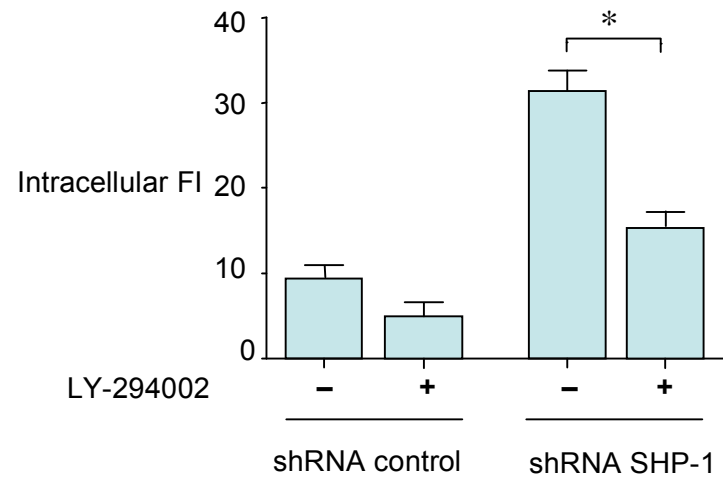

**Supplementary Figure 7.** SHP-1-mediated phagocytosis is PI3-K dependent. Phagocytosis of Texas-red labeled *E. coli* was measured shRNA treated J774 cells in the presence or absence of LY-294002 (25  $\mu$ M) treatment for 20 min as described in Methods. Fluorescence intensity (FI) was quantified as in Fig. 2b. The data are the means ( $\pm$ SD) of three independent experiments (\* $P < 0.05$ , Student's unpaired  $t$  test).
